# Supplementary material for: Detection of Brominated Plastics from E-Waste by Short-Wave Infrared Spectroscopy
Source: MDPI journal article supplement (doi:10.3390/recycling6030054), 2021-08-25
Supplement: s1 [file s1]

# A Tool for the Automatic Aggregation and Validation of the Results of Physically Based Distributed Slope Stability Models

Maria Alexandra Bulzinetti <sup>1</sup>, Samuele Segoni <sup>1,\*</sup>, Giulio Pappafico <sup>2</sup>, Elena Benedetta Masi <sup>1</sup>, Guglielmo Rossi <sup>3</sup> and Veronica Tofani <sup>1</sup>

<sup>1</sup> Department of Earth Sciences, University of Firenze, 50121 Firenze, Italy; mariaalexandra.bulzinetti@unifi.it (M.A.B.); elenabenedetta.masi@unifi.it (E.B.M.); veronica.tofani@unifi.it (V.T.)

<sup>2</sup> Department of Pure and Applied Sciences, University of Urbino, 61029 Urbino, Italy; giulio.pappafico@uniurb.it

<sup>3</sup> Centre for the Civil Protection, University of Firenze, 50125 Firenze, Italy; guglielmo.rossi@unifi.it

\* Correspondence: samuele.segoni@unifi.it; Tel.: +39-0552-755975

**Supplementary Material:** The contingency matrix tables were imported in a spreadsheet to calculate some skill scores that are commonly used as quantitative indicators of model performances [1,2]:

$$\text{Efficiency} = (TP + TN) / (TP + TN + FP + FN)$$

$$\text{Misclassification rate} = (FP + FN) / (TP + TN + FN + FP)$$

$$\text{Odds ratio} = (TP + TN) / (FP + FN)$$

$$\text{Positive predictive power} = TP / (TP + FP)$$

$$\text{Negative predictive power} = TN / (FN + TN)$$

$$\text{Sensitivity} = TP / (TP + FN)$$

$$\text{Specificity} = TN / (FP + TN)$$

$$\text{False positive rate} = FP / (FP + TN)$$

$$\text{False negative rate} = FN / (TP + FN)$$

$$\text{Likelihood ratio} = \text{Sensitivity} / (1 - \text{Specificity})$$

Where TP are true positives, TN are true negatives, FP are false positives and FN are false negatives (as explained in the main text).

The following table reports a summary of all the skill scores calculated starting from the contingency matrixes.

**Citation:** Bulzinetti, M.A.; Segoni, S.; Pappafico, G.; Masi, E.B.; Rossi, G.; Tofani, V. A Tool for the Automatic Aggregation and Validation of the Results of Physically Based Distributed Slope Stability Models. *Water* **2021**, *13*, 2313. <https://doi.org/10.3390/w13172313>

Academic Editor: Yu Huang

Received: 13 July 2021

Accepted: 21 August 2021

Published: 24 August 2021

**Publisher's Note:** MDPI stays neutral with regard to jurisdictional claims in published maps and institutional affiliations.

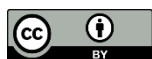

**Copyright:** © 2021 by the authors. Licensee MDPI, Basel, Switzerland. This article is an open access article distributed under the terms and conditions of the Creative Commons Attribution (CC BY) license (<http://creativecommons.org/licenses/by/4.0/>).

**Table S1.** Skill scores resulting from all the DTVT configuration tested.

| Quantitative Indicators   | IDT = 3% |         |         |         |         |         |
|---------------------------|----------|---------|---------|---------|---------|---------|
|                           | FPT 60%  | FPT 70% | FPT 75% | FPT 80% | FPT 85% | FPT 90% |
| a(TP)                     | 105      | 105     | 105     | 105     | 105     | 105     |
| b(FP)                     | 182      | 170     | 158     | 143     | 135     | 121     |
| c(FN)                     | 0        | 0       | 0       | 0       | 0       | 0       |
| d(TN)                     | 233      | 245     | 257     | 272     | 280     | 294     |
| Efficiency                | 0.650    | 0.673   | 0.696   | 0.725   | 0.740   | 0.767   |
| Misclassification rate    | 0.350    | 0.327   | 0.304   | 0.275   | 0.260   | 0.233   |
| Odds ratio                | 1.857    | 2.059   | 2.291   | 2.636   | 2.852   | 3.298   |
| Positive predictive power | 0.366    | 0.382   | 0.399   | 0.423   | 0.438   | 0.465   |
| Negative predictive power | 1.000    | 1.000   | 1.000   | 1.000   | 1.000   | 1.000   |
| Sensitivity               | 1.000    | 1.000   | 1.000   | 1.000   | 1.000   | 1.000   |
| Specificity               | 0.561    | 0.590   | 0.619   | 0.655   | 0.675   | 0.708   |
| False positive rate       | 0.439    | 0.410   | 0.381   | 0.345   | 0.325   | 0.292   |
| False negative rate       | 0.000    | 0.000   | 0.000   | 0.000   | 0.000   | 0.000   |
| Likelihood ratio          | 2.280    | 2.441   | 2.627   | 2.902   | 3.074   | 3.430   |
| Quantitative Indicators   | IDT = 5% |         |         |         |         |         |
|                           | FPT 60%  | FPT 70% | FPT 75% | FPT 80% | FPT 85% | FPT 90% |
| a(TP)                     | 105      | 105     | 105     | 105     | 105     | 101     |
| b(FP)                     | 152      | 138     | 128     | 110     | 95      | 88      |
| c(FN)                     | 0        | 0       | 0       | 0       | 0       | 4       |
| d(TN)                     | 263      | 277     | 287     | 305     | 320     | 327     |
| Efficiency                | 0.708    | 0.735   | 0.754   | 0.788   | 0.817   | 0.823   |
| Misclassification rate    | 0.292    | 0.265   | 0.246   | 0.212   | 0.183   | 0.177   |
| Odds ratio                | 2.421    | 2.768   | 3.063   | 3.727   | 4.474   | 4.652   |
| Positive predictive power | 0.409    | 0.432   | 0.451   | 0.488   | 0.525   | 0.534   |
| Negative predictive power | 1.000    | 1.000   | 1.000   | 1.000   | 1.000   | 0.988   |
| Sensitivity               | 1.000    | 1.000   | 1.000   | 1.000   | 1.000   | 0.962   |
| Specificity               | 0.634    | 0.667   | 0.692   | 0.735   | 0.771   | 0.788   |
| False positive rate       | 0.366    | 0.333   | 0.308   | 0.265   | 0.229   | 0.212   |
| False negative rate       | 0.000    | 0.000   | 0.000   | 0.000   | 0.000   | 0.038   |
| Likelihood ratio          | 2.730    | 3.007   | 3.242   | 3.773   | 4.368   | 4.536   |

| Quantitative Indicators   | IDT = 10% |         |         |         |         |         |
|---------------------------|-----------|---------|---------|---------|---------|---------|
|                           | FPT 60%   | FPT 70% | FPT 75% | FPT 80% | FPT 85% | FPT 90% |
| a(TP)                     | 100       | 97      | 95      | 95      | 87      | 81      |
| b(FP)                     | 97        | 85      | 75      | 67      | 56      | 42      |
| c(FN)                     | 5         | 8       | 10      | 10      | 18      | 24      |
| d(TN)                     | 318       | 330     | 340     | 348     | 359     | 373     |
| Efficiency                | 0.804     | 0.821   | 0.837   | 0.852   | 0.858   | 0.873   |
| Misclassification rate    | 0.196     | 0.179   | 0.163   | 0.148   | 0.142   | 0.127   |
| Odds ratio                | 4.098     | 4.591   | 5.118   | 5.753   | 6.027   | 6.879   |
| Positive predictive power | 0.508     | 0.533   | 0.559   | 0.586   | 0.608   | 0.659   |
| Negative predictive power | 0.985     | 0.976   | 0.971   | 0.972   | 0.952   | 0.940   |
| Sensitivity               | 0.952     | 0.924   | 0.905   | 0.905   | 0.829   | 0.771   |
| Specificity               | 0.766     | 0.795   | 0.819   | 0.839   | 0.865   | 0.899   |
| False positive rate       | 0.234     | 0.205   | 0.181   | 0.161   | 0.135   | 0.101   |
| False negative rate       | 0.048     | 0.076   | 0.095   | 0.095   | 0.171   | 0.229   |
| Likelihood ratio          | 4.075     | 4.510   | 5.006   | 5.604   | 6.140   | 7.622   |
| Quantitative Indicators   | IDT = 15% |         |         |         |         |         |
|                           | FPT 60%   | FPT 70% | FPT 75% | FPT 80% | FPT 85% | FPT 90% |
| a(TP)                     | 95        | 95      | 81      | 81      | 68      | 68      |
| b(FP)                     | 68        | 55      | 43      | 33      | 27      | 21      |
| c(FN)                     | 10        | 10      | 24      | 24      | 37      | 37      |
| d(TN)                     | 347       | 360     | 372     | 382     | 388     | 394     |
| Efficiency                | 0.850     | 0.875   | 0.871   | 0.890   | 0.877   | 0.888   |
| Misclassification rate    | 0.150     | 0.125   | 0.129   | 0.110   | 0.123   | 0.112   |
| Odds ratio                | 5.667     | 7.000   | 6.761   | 8.123   | 7.125   | 7.966   |
| Positive predictive power | 0.583     | 0.633   | 0.653   | 0.711   | 0.716   | 0.764   |
| Negative predictive power | 0.972     | 0.973   | 0.939   | 0.941   | 0.913   | 0.914   |
| Sensitivity               | 0.905     | 0.905   | 0.771   | 0.771   | 0.648   | 0.648   |
| Specificity               | 0.836     | 0.867   | 0.896   | 0.920   | 0.935   | 0.949   |
| False positive rate       | 0.164     | 0.133   | 0.104   | 0.080   | 0.065   | 0.051   |
| False negative rate       | 0.095     | 0.095   | 0.229   | 0.229   | 0.352   | 0.352   |
| Likelihood ratio          | 5.522     | 6.827   | 7.445   | 9.701   | 9.954   | 12.798  |

## References

1. Beguería, S. Validation and evaluation of predictive models in hazard assessment and risk management. *Nat. Hazards* **2006**, *37*, 315–329, doi:10.1007/s11069-005-5182-6.
2. Martelloni, G.; Segoni, I.S.; Fanti, I.R.; Catani, I.F. Rainfall thresholds for the forecasting of landslide occurrence at regional scale. **2012**, *9*, 485–495, doi:10.1007/s10346-011-0308-2.

{Bibliography}
